# Supplementary material for: In Vitro Evaluation of Five Antimicrobial Peptides against the Plant Pathogen Erwinia amylovora
Source: PubMed Central journal article supplement (PMC8069920; doi:10.3390/biom11040554), 2021-04-09
Supplement: biomolecules-11-00554-s001.pdf [file biomolecules-11-00554-s001.pdf]

PG-LR-BP100-puro\_190218133329 #22-36 RT: 0.60-0.98 AV: 15 NL: 8,32E7  
T: + p ESI Full ms [50,00-2000,00]

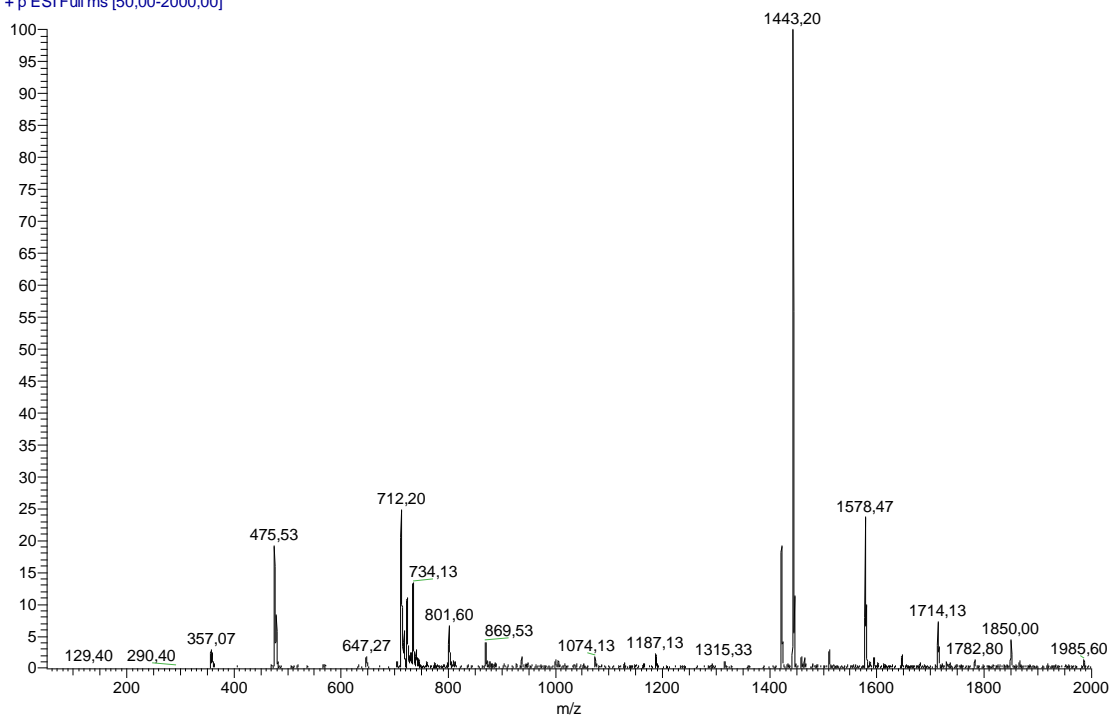

**Figure S1.** Mass spectrum (ESI-IT, positive mode) of peptide BP100 (MW=1419.9 Da), highlighting the quasi-molecular ion ( $[P+H]^+$ ), its sodium adduct ( $[P+Na]^+$ , base peak), the di-protonated ( $[P+2H]^{2+}$ ) ion and its sodium adduct ( $[P+2Na]^{2+}$ ), and the tri-protonated ( $[P+3H]^{3+}$ ) and tetra-protonated ( $[P+4H]^{4+}$ ) ions of the target peptide (P).

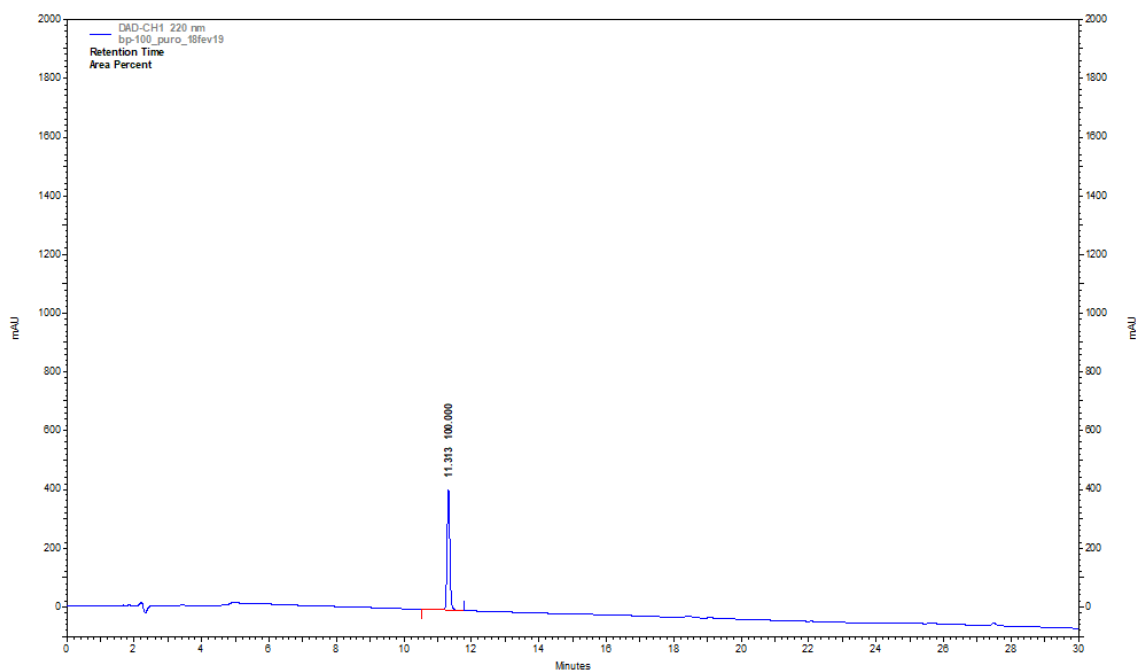

**Figure S2.** RP-HPLC chromatogram for peptide BP100, after purification; gradient elution from 1 to 100% ACN in 0.05% aqueous TFA at 1 mL/min flow rate, for 30 min, on a C-18 column (150 × 4.6 mm ID and 5 μm pore size); detection at 220 nm.

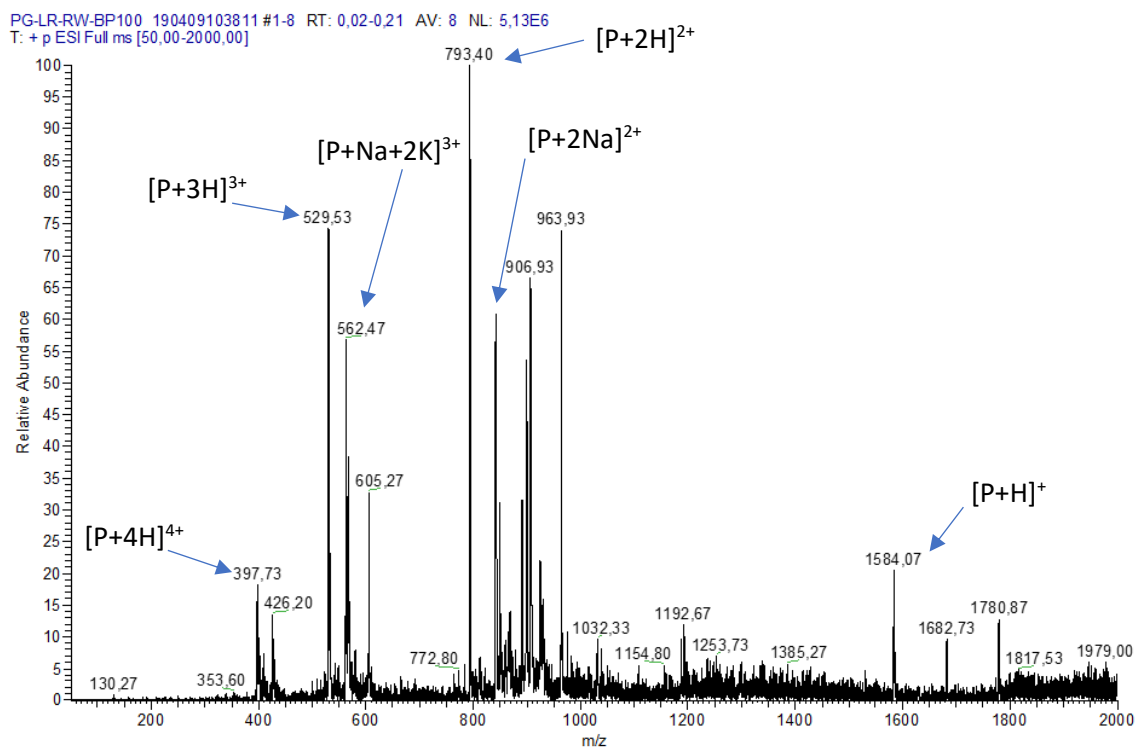

**Figure S3.** Mass spectrum (ESI-IT, positive mode) of peptide RW-BP100 (MW=1583.0 Da), highlighting the quasi-molecular ion ( $[P+H]^+$ ), the di-protonated ( $[P+2H]^{2+}$ , base peak) ion and respective sodium adduct ( $[P+2Na]^{2+}$ ), the tri-protonated ion ( $[P+3H]^{3+}$ ) and its sodium and dipotassium adduct ( $[P+Na+2K]^{3+}$ ), and the tetra-protonated ( $[P+4H]^{4+}$ ) ion of the target peptide (P).

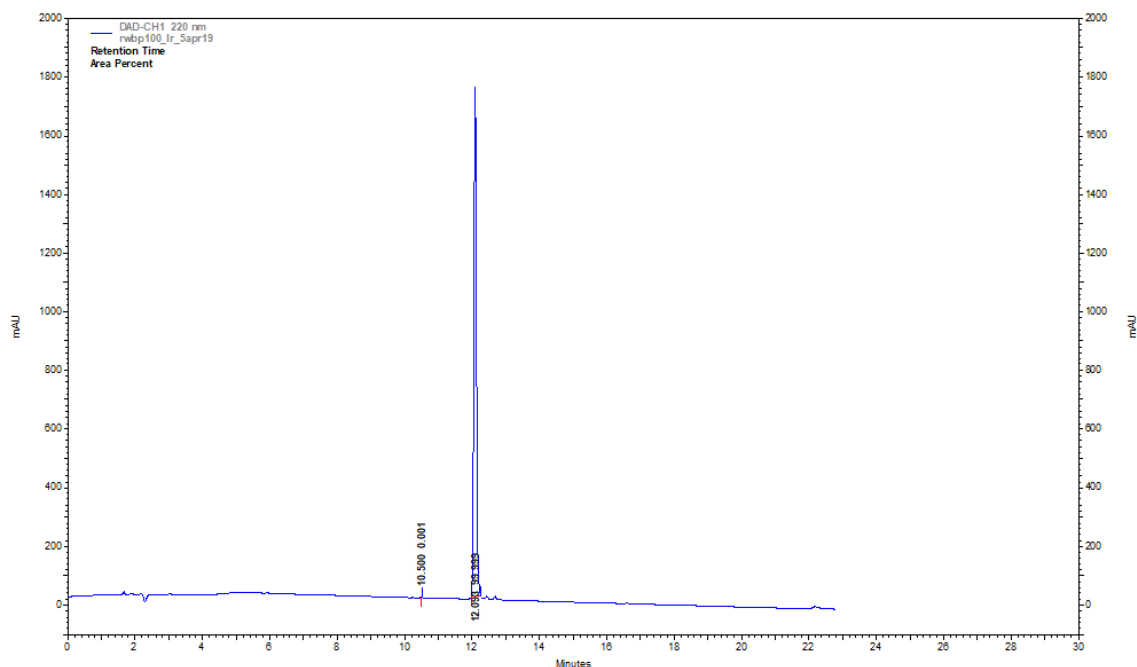

**Figure S4.** RP-HPLC chromatogram for peptide RW-BP100, after purification; gradient elution from 1 to 100% ACN in 0.05% aqueous TFA at 1 mL/min flow rate, for 30 min, on a C-18 column (150 × 4.6 mm ID and 5 μm pore size); detection at 220 nm.

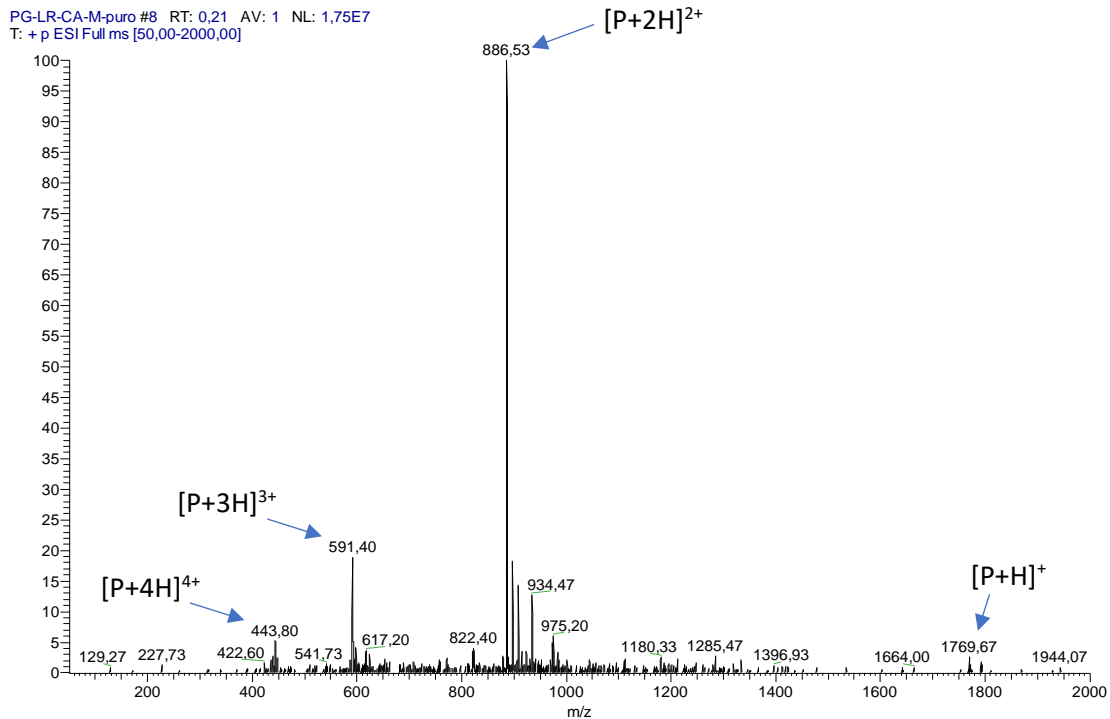

**Figure S5.** Mass spectrum (ESI-IT, positive mode) of peptide CA-M (MW=1769.2 Da), showing the quasi-molecular ion ( $[P+H]^+$ ), the di-protonated ( $[P+2H]^{2+}$ , base peak), the tri-protonated ( $[P+3H]^{3+}$ ), and the tetra-protonated ( $[P+4H]^{4+}$ ) ions of the target peptide (P).

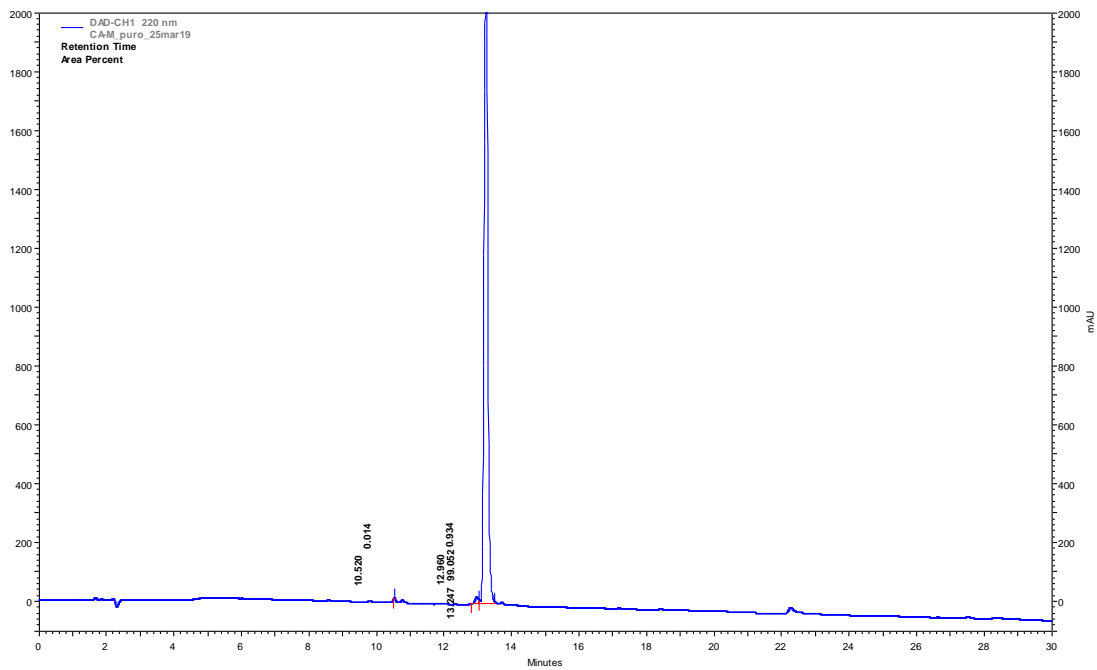

**Figure S6.** RP-HPLC chromatogram for peptide CA-M after purification; gradient elution from 1 to 100% ACN in 0.05% aqueous TFA at 1 mL/min flow rate, for 30 min, on a C-18 column (150 × 4.6 mm ID and 5 μm pore size); detection at 220 nm.

PG-LR-D4E1 190326140118 #70 RT: 1.97 AV: 1 NL: 1,47E7  
T: + p ESI Full ms [50,00-2000,00]

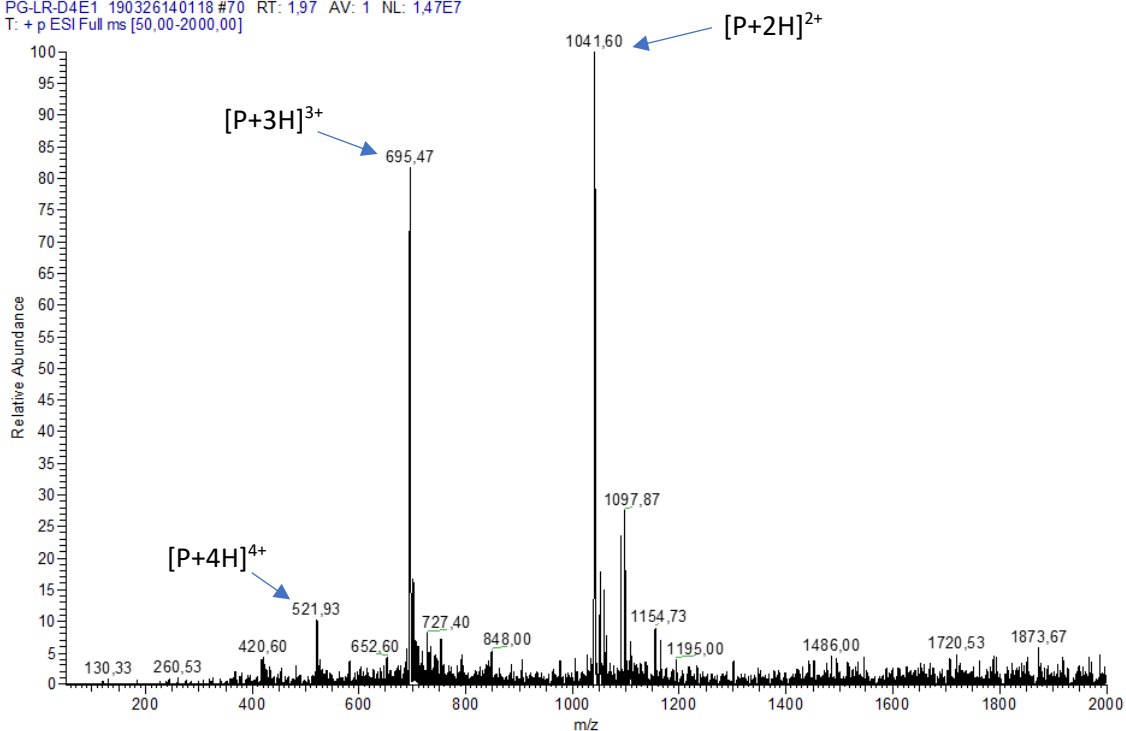

**Figure S7.** Mass spectrum (ESI-IT, positive mode) of peptide D4E1 (MW=2079.4 Da), highlighting the di-protonated ( $[P+2H]^{2+}$ , base peak), tri-protonated ( $[P+3H]^{3+}$ ) and tetra-protonated ( $[P+4H]^{4+}$ ) ions of the target peptide (P).

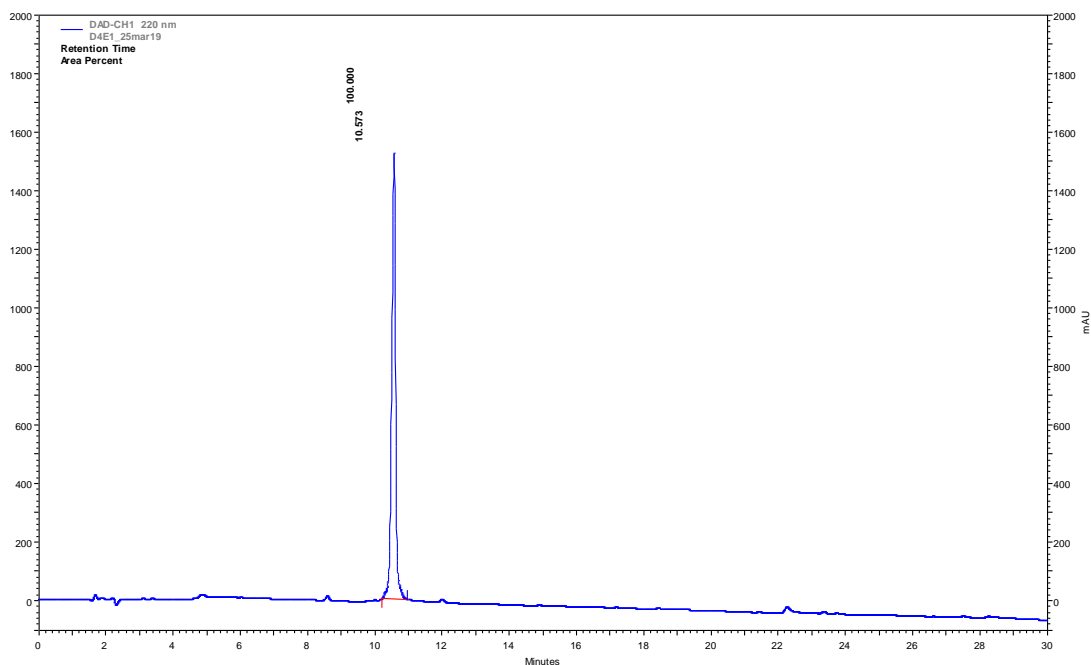

**Figure S8.** RP-HPLC chromatogram for peptide D4E1, after purification; gradient elution from 1 to 100% ACN in 0.05% aqueous TFA at 1 mL/min flow rate, for 30 min, on a C-18 column (150 × 4.6 mm ID and 5 μm pore size); detection at 220 nm.

PG-LR-Pep-3-1\_190208132914 #3-4 RT: 0,07-0,10 AV: 2 NL: 9,76E6  
T: + p ESI Full ms [50,00-2000,00]

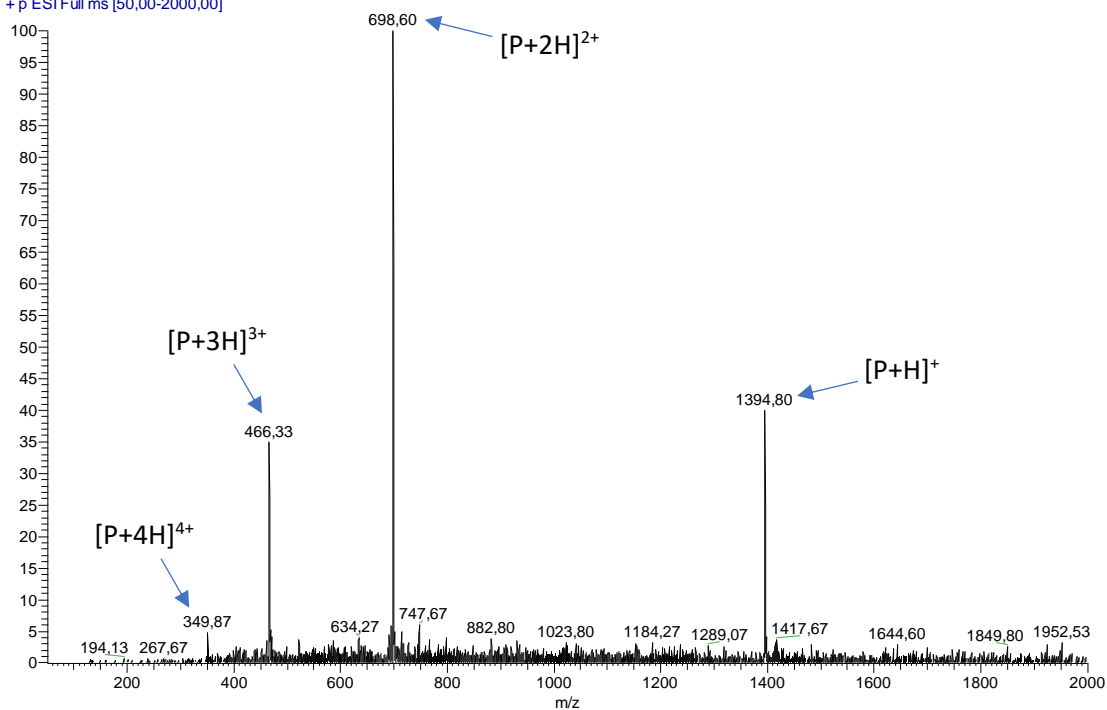

**Figure S9.** Mass spectrum (ESI-IT, positive mode) of peptide 3.1 (MW=1393.9 Da), showing the quasi-molecular ( $[P+H]^+$ , base peak), di-protonated ( $[P+2H]^{2+}$ ), tri-protonated ( $[P+3H]^{3+}$ ) and tetra-protonated ( $[P+4H]^{4+}$ ) ions of the target peptide (P).

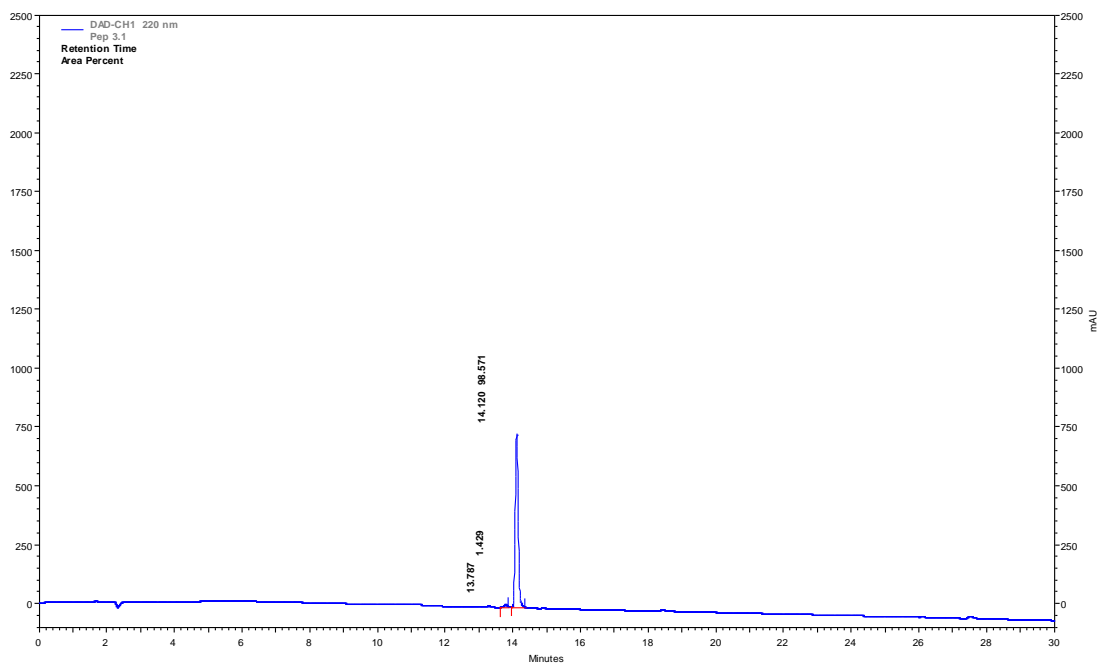

**Figure S10.** RP-HPLC chromatogram for peptide 3.1, after purification; gradient elution from 1 to 100% ACN in 0.05% aqueous TFA at 1 mL/min flow rate, for 30 min, on a C-18 column (150 × 4.6 mm ID and 5 μm pore size); detection at 220 nm.

PG-LR-Dhvar #7 RT: 0,19 AV: 1 NL: 7,01E6  
T: + p ESI Full ms [50,00-2000,00]

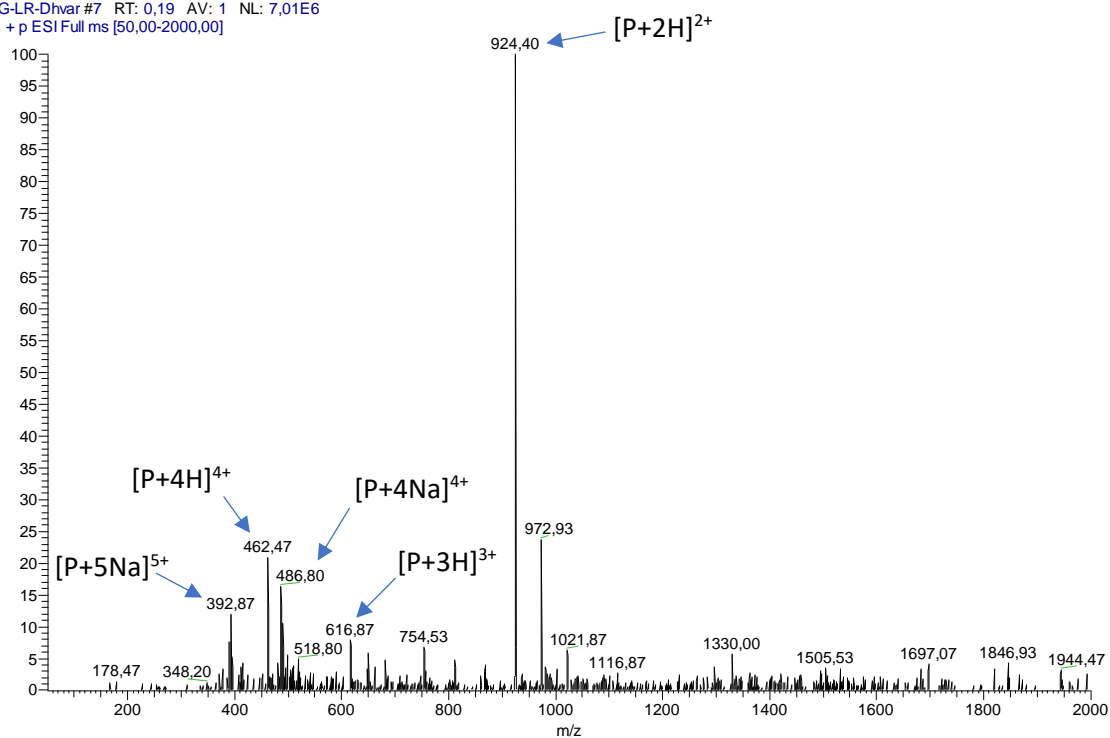

**Figure S11.** Mass spectrum (ESI-IT, positive mode) of peptide Dhvar-5 (MW=1845.3 Da), highlighting the di-protonated ion ( $[P+2H]^{2+}$ , base peak), the tri-protonated ion ( $[P+3H]^{3+}$ ), the tetra-protonated ion ( $[P+4H]^{4+}$ ) and its sodium adduct ( $[P+4Na]^{4+}$ ), and the penta-sodium adduct ( $[P+5Na]^{5+}$ ) of the target peptide (P).

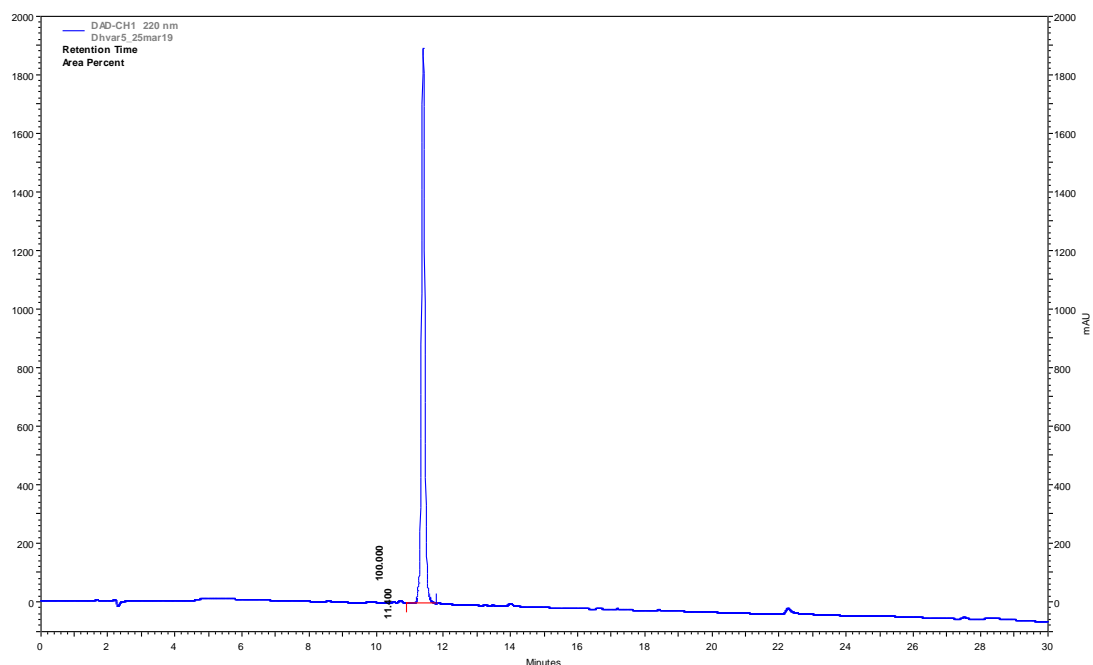

**Figure S12.** RP-HPLC chromatogram for peptide Dhvar-5, after purification; gradient elution from 1 to 100% ACN in 0.05% aqueous TFA at 1 mL/min flow rate, for 30 min, on a C-18 column (150 × 4.6 mm ID and 5 μm pore size); detection at 220 nm.

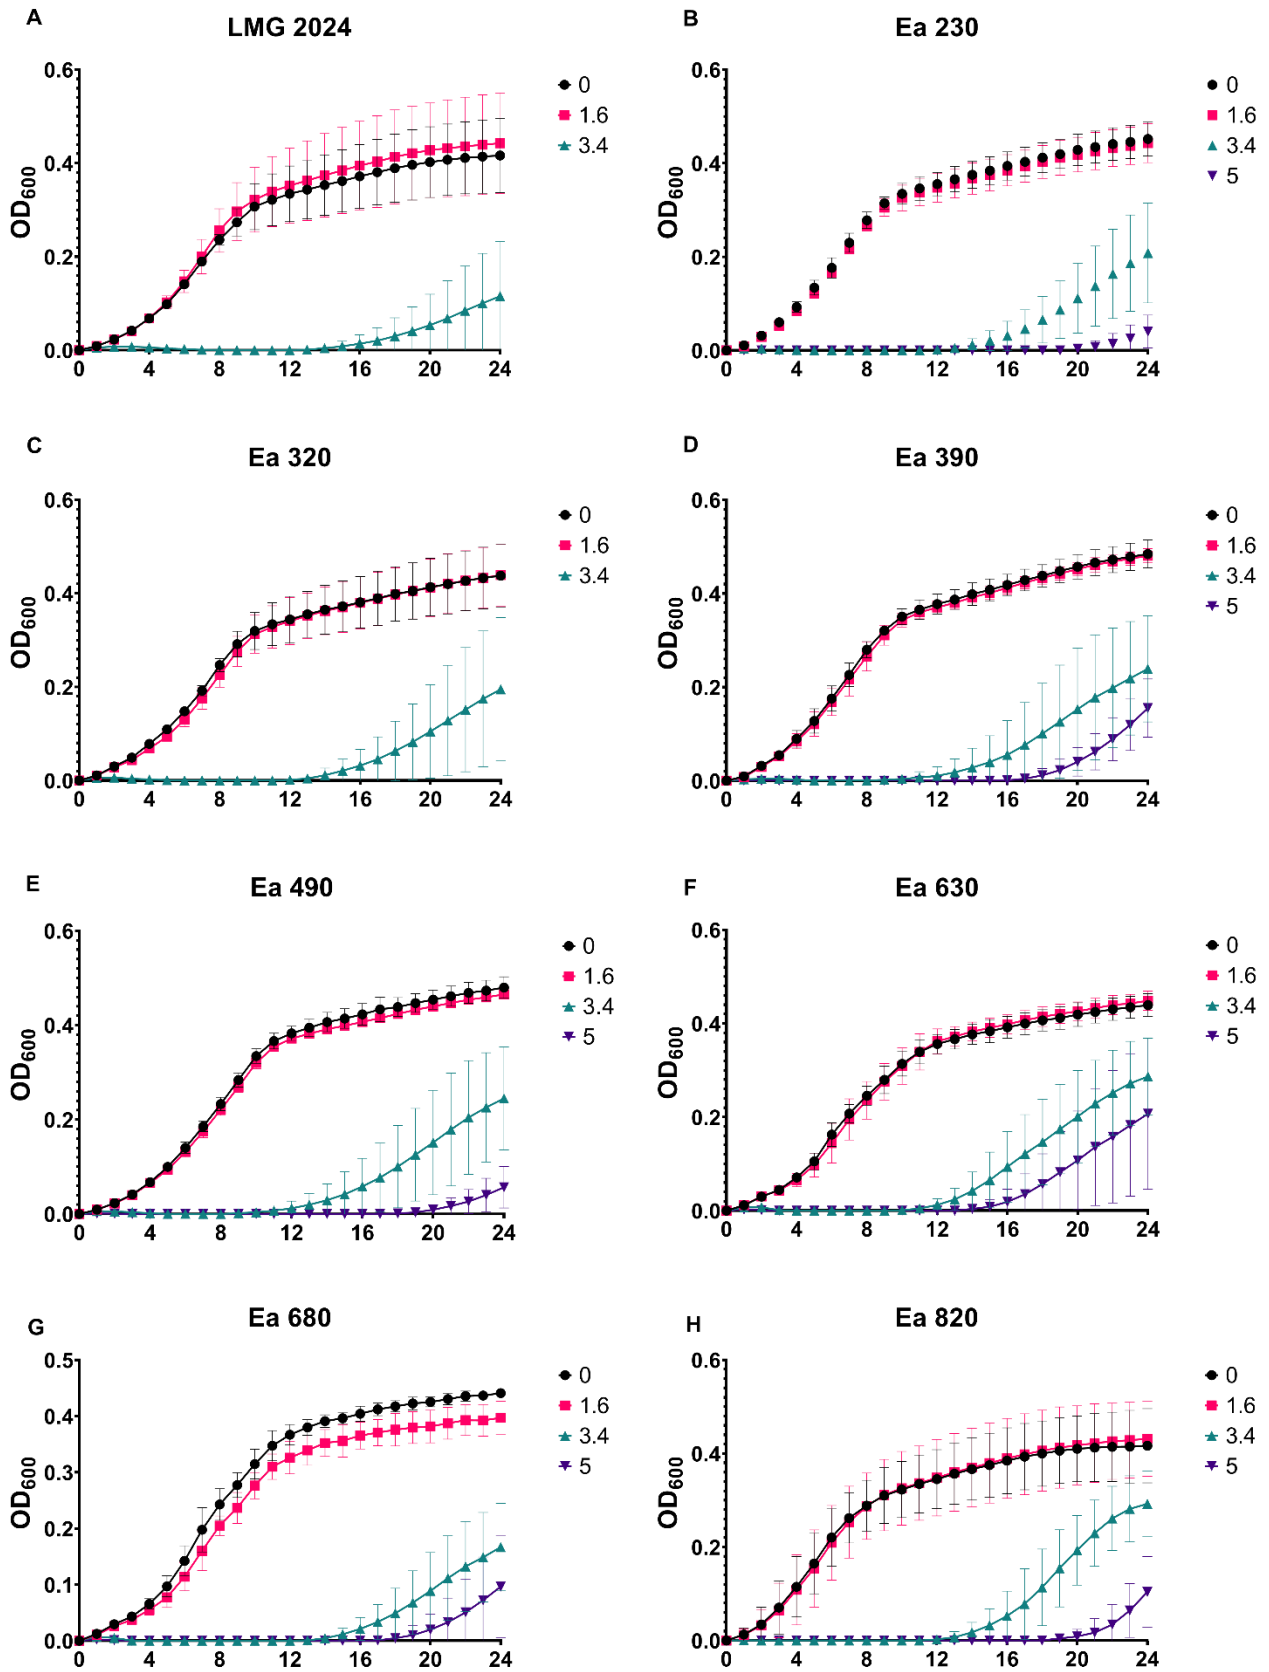

**Figure S13.** Growth curves of eight *E. amylovora* strains exposed to increasing concentrations of BP100 (0, 1.6, 3.4, and 5 μM). Vertical bars: mean value with standard deviation (n = 3).

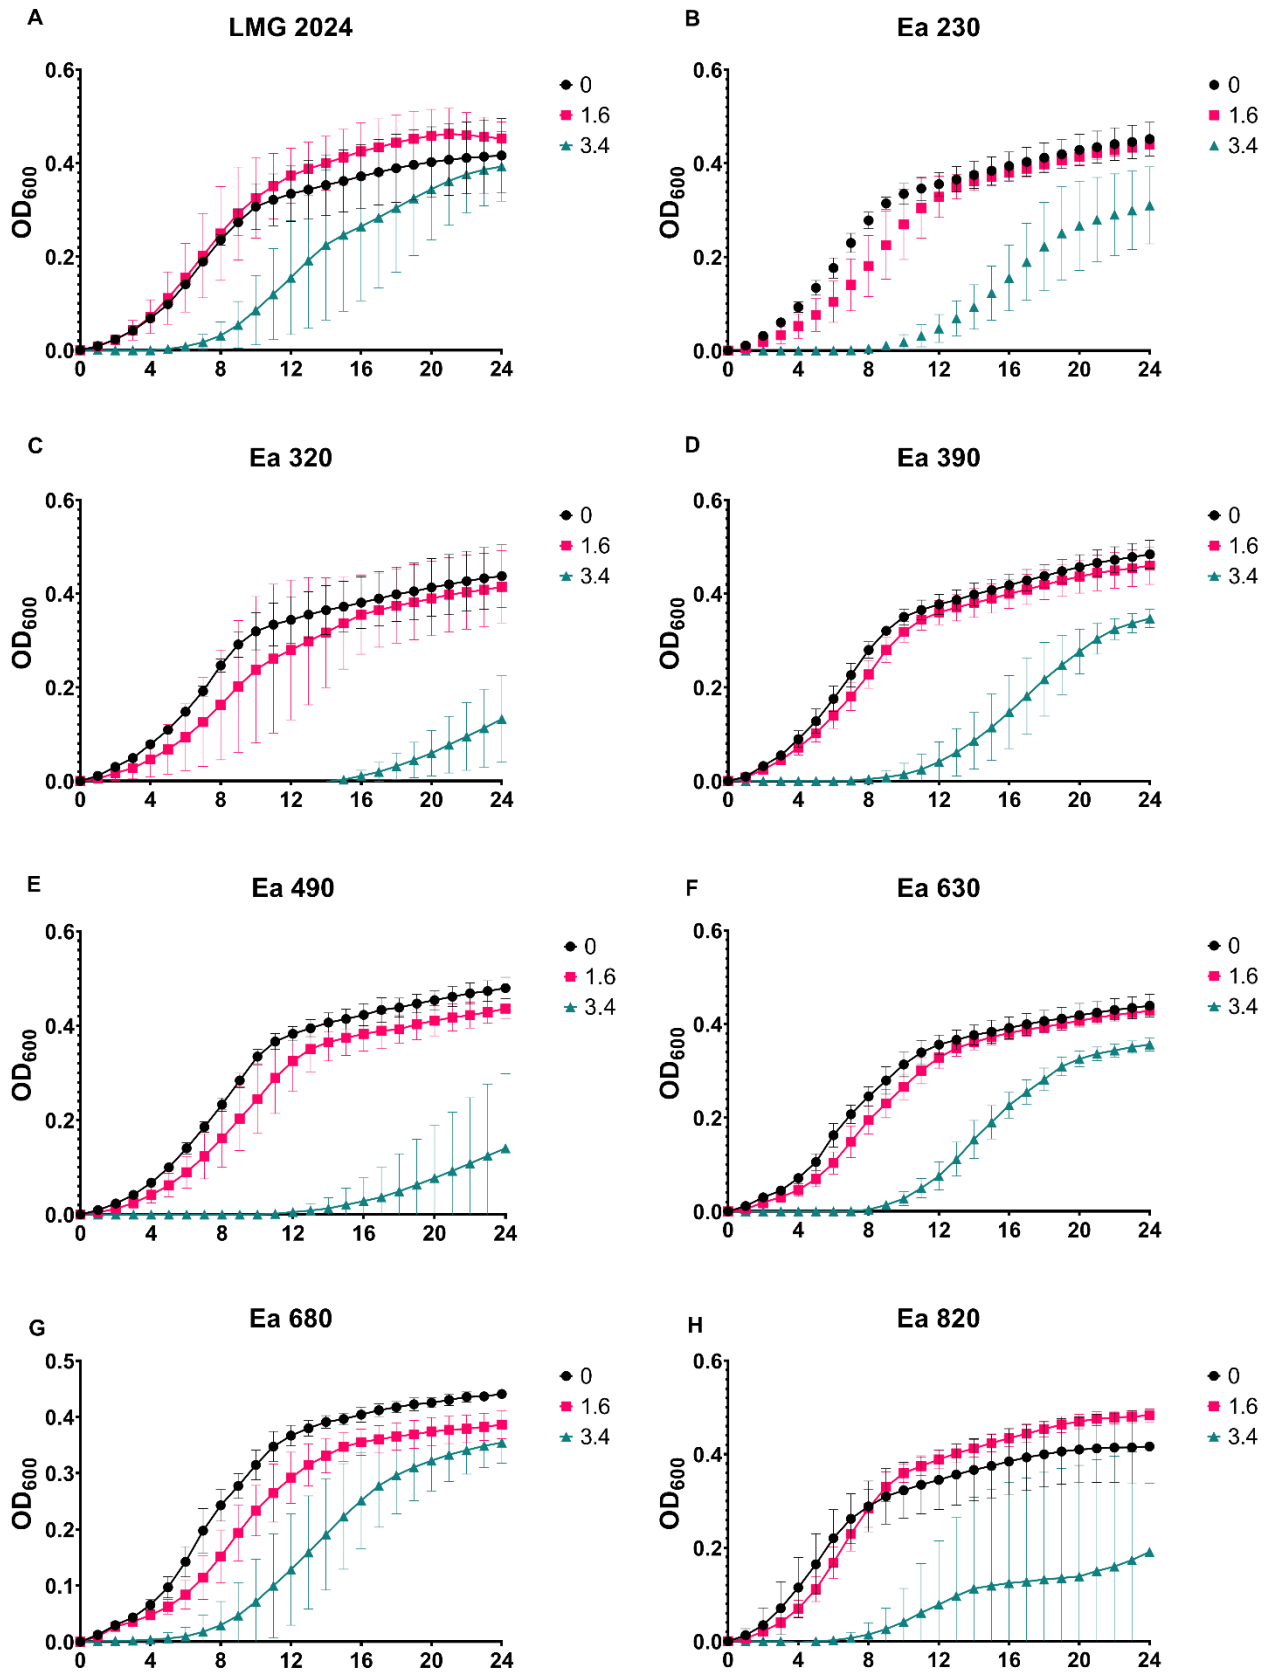

**Figure S14.** Growth curves of eight *E. amylovora* strains exposed to increasing concentrations of RW-BP100 (0, 1.6, and 3.4  $\mu\text{M}$ ). Vertical bars: mean value with standard deviation (n = 3).



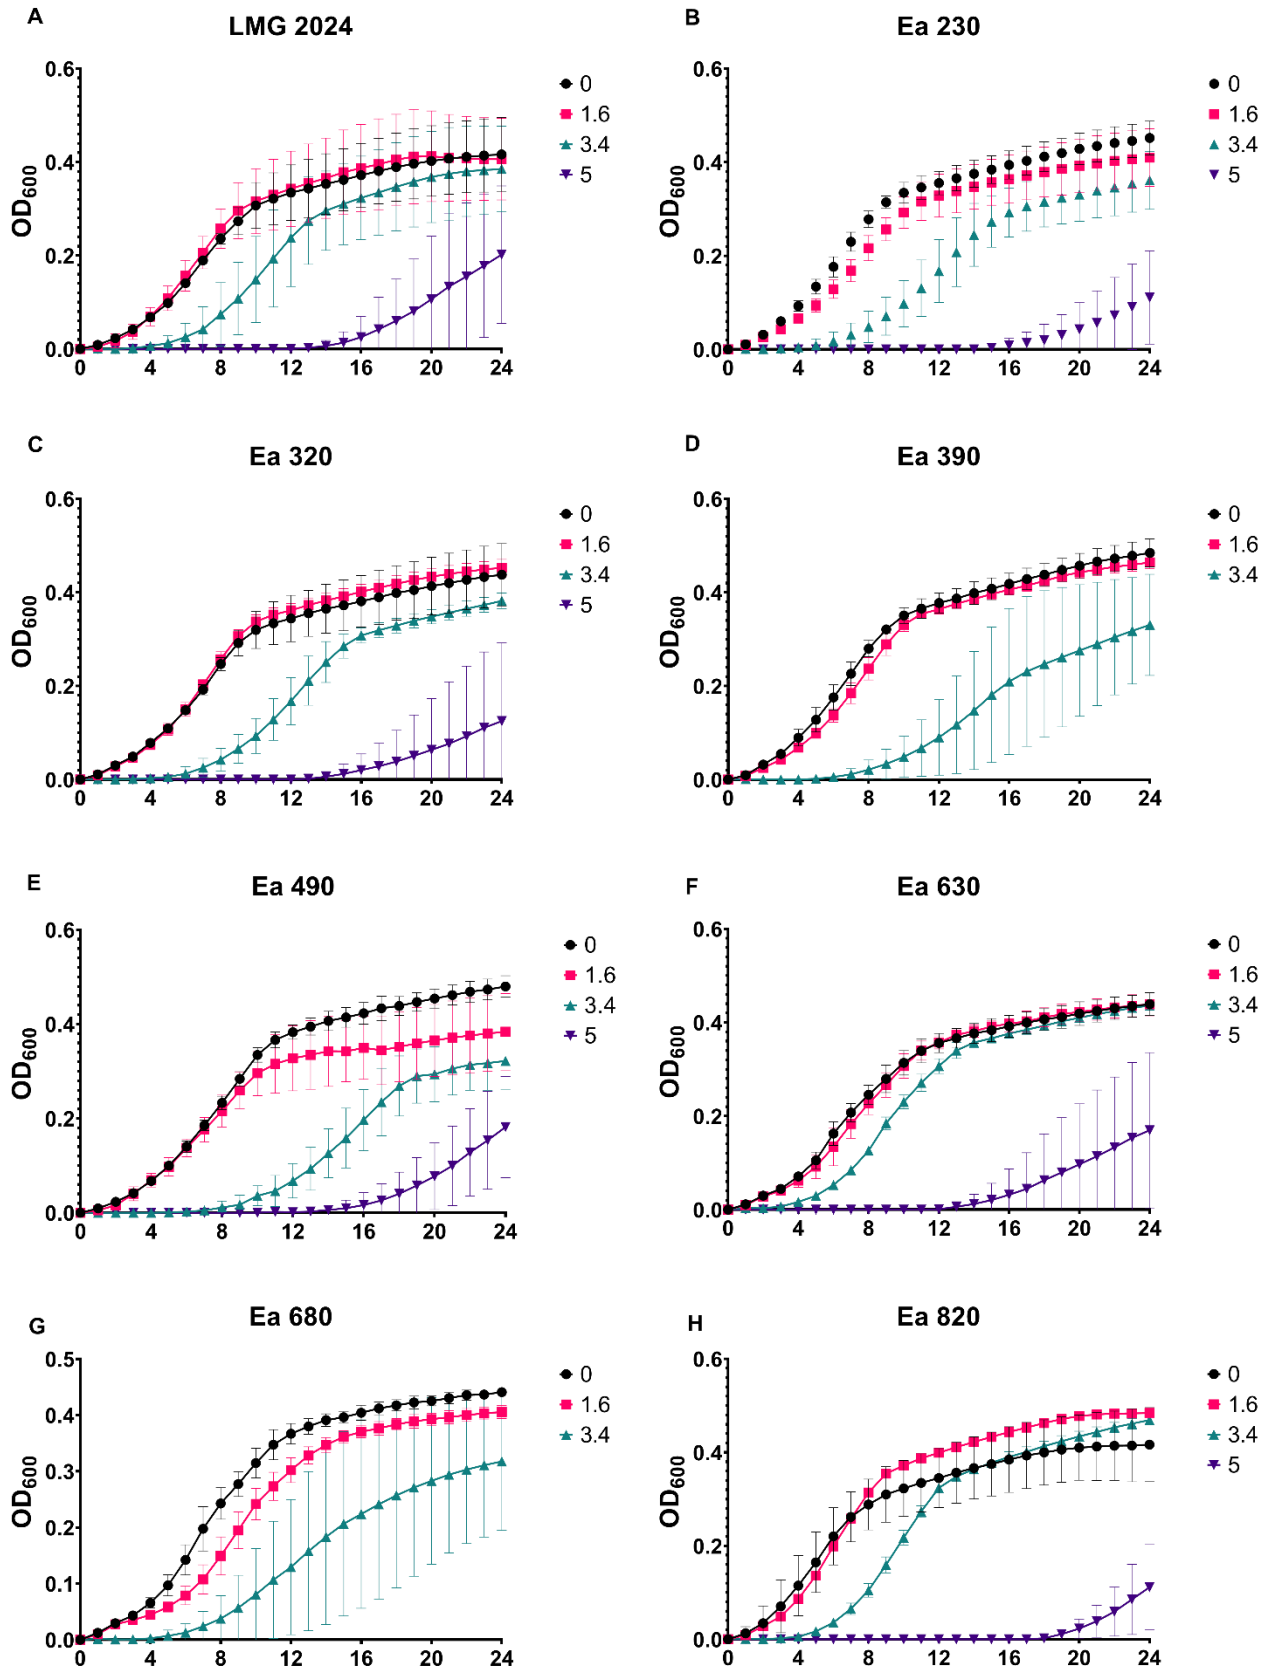

**Figure S15.** Growth curves of eight *E. amylovora* strains exposed to increasing concentrations of CA-M (0, 1.6, 3.4, and 5  $\mu$ M). Vertical bars: mean value with standard deviation (n = 3).

**Supplementary Table 1.** AMPs antibiogram susceptibility. (+): inhibition occurred; (-): inhibition did not occur; C+: Type strain LMG 2024.

| AMP    | Strain | Concentrations ( $\mu\text{M}$ ) |     |     |    |    |     |     |     |
|--------|--------|----------------------------------|-----|-----|----|----|-----|-----|-----|
|        |        | 0.4                              | 1.6 | 6.2 | 25 | 50 | 100 | 150 | 200 |
| BP100  | Ea 230 | -                                | -   | -   | +  | +  | +   | +   | +   |
|        | Ea 240 | -                                | -   | -   | +  | +  | +   | +   | +   |
|        | Ea 250 | -                                | -   | -   | +  | +  | +   | +   | +   |
|        | Ea 260 | -                                | -   | -   | +  | +  | +   | +   | +   |
|        | Ea 270 | -                                | -   | -   | +  | +  | +   | +   | +   |
|        | Ea 280 | -                                | -   | -   | +  | +  | +   | +   | +   |
|        | Ea 310 | -                                | -   | -   | +  | +  | +   | +   | +   |
|        | Ea 320 | -                                | -   | -   | +  | +  | +   | +   | +   |
|        | Ea 340 | -                                | -   | -   | +  | +  | +   | +   | +   |
|        | Ea 350 | -                                | -   | -   | +  | +  | +   | +   | +   |
|        | Ea 410 | -                                | -   | -   | +  | +  | +   | +   | +   |
|        | Ea 430 | -                                | -   | -   | +  | +  | +   | +   | +   |
|        | Ea 450 | -                                | -   | -   | +  | +  | +   | +   | +   |
|        | Ea 460 | -                                | -   | -   | +  | +  | +   | +   | +   |
|        | Ea 470 | -                                | -   | -   | +  | +  | +   | +   | +   |
|        | Ea 480 | -                                | -   | -   | +  | +  | +   | +   | +   |
|        | Ea 500 | -                                | -   | -   | +  | +  | +   | +   | +   |
|        | Ea 510 | -                                | -   | -   | +  | +  | +   | +   | +   |
|        | Ea 520 | -                                | -   | -   | +  | +  | +   | +   | +   |
|        | Ea 540 | -                                | -   | -   | +  | +  | +   | +   | +   |
|        | Ea 570 | -                                | -   | -   | +  | +  | +   | +   | +   |
|        | Ea 580 | -                                | -   | -   | +  | +  | +   | +   | +   |
|        | Ea 620 | -                                | -   | -   | +  | +  | +   | +   | +   |
|        | Ea 630 | -                                | -   | -   | +  | +  | +   | +   | +   |
|        | Ea 670 | -                                | -   | -   | +  | +  | +   | +   | +   |
|        | Ea 720 | -                                | -   | -   | +  | +  | +   | +   | +   |
|        | Ea 730 | -                                | -   | -   | +  | +  | +   | +   | +   |
|        | Ea 740 | -                                | -   | -   | +  | +  | +   | +   | +   |
|        | Ea 780 | -                                | -   | -   | +  | +  | +   | +   | +   |
|        | Ea 790 | -                                | -   | -   | +  | +  | +   | +   | +   |
|        | Ea 390 | -                                | -   | -   | -  | +  | +   | +   | +   |
|        | Ea 490 | -                                | -   | -   | -  | +  | +   | +   | +   |
|        | Ea 610 | -                                | -   | -   | -  | +  | +   | +   | +   |
|        | Ea 680 | -                                | -   | -   | -  | +  | +   | +   | +   |
|        | Ea 750 | -                                | -   | -   | -  | +  | +   | +   | +   |
| Ea 820 | -      | -                                | -   | -   | +  | +  | +   | +   |     |
| C+     | -      | -                                | -   | -   | +  | +  | +   | +   |     |

| AMP      | Strain | Concentrations (µM) |     |     |    |    |     |     |     |
|----------|--------|---------------------|-----|-----|----|----|-----|-----|-----|
|          |        | 0.4                 | 1.6 | 6.2 | 25 | 50 | 100 | 150 | 200 |
| RW-BP100 |        |                     |     |     |    |    |     |     |     |
|          | Ea 230 | -                   | -   | -   | +  | +  | +   | +   | +   |
|          | Ea 240 | -                   | -   | -   | +  | +  | +   | +   | +   |
|          | Ea 250 | -                   | -   | -   | +  | +  | +   | +   | +   |
|          | Ea 260 | -                   | -   | -   | +  | +  | +   | +   | +   |
|          | Ea 270 | -                   | -   | -   | +  | +  | +   | +   | +   |
|          | Ea 280 | -                   | -   | -   | +  | +  | +   | +   | +   |
|          | Ea 310 | -                   | -   | -   | +  | +  | +   | +   | +   |
|          | Ea 320 | -                   | -   | -   | +  | +  | +   | +   | +   |
|          | Ea 340 | -                   | -   | -   | +  | +  | +   | +   | +   |
|          | Ea 350 | -                   | -   | -   | +  | +  | +   | +   | +   |
|          | Ea 410 | -                   | -   | -   | +  | +  | +   | +   | +   |
|          | Ea 430 | -                   | -   | -   | +  | +  | +   | +   | +   |
|          | Ea 450 | -                   | -   | -   | +  | +  | +   | +   | +   |
|          | Ea 460 | -                   | -   | -   | +  | +  | +   | +   | +   |
|          | Ea 470 | -                   | -   | -   | +  | +  | +   | +   | +   |
|          | Ea 480 | -                   | -   | -   | +  | +  | +   | +   | +   |
|          | Ea 500 | -                   | -   | -   | +  | +  | +   | +   | +   |
|          | Ea 510 | -                   | -   | -   | +  | +  | +   | +   | +   |
|          | Ea 540 | -                   | -   | -   | +  | +  | +   | +   | +   |
|          | Ea 620 | -                   | -   | -   | +  | +  | +   | +   | +   |
|          | Ea 390 | -                   | -   | -   | -  | +  | +   | +   | +   |
|          | Ea 490 | -                   | -   | -   | -  | +  | +   | +   | +   |
|          | Ea 520 | -                   | -   | -   | -  | +  | +   | +   | +   |
|          | Ea 570 | -                   | -   | -   | -  | +  | +   | +   | +   |
|          | Ea 580 | -                   | -   | -   | -  | +  | +   | +   | +   |
|          | Ea 610 | -                   | -   | -   | -  | +  | +   | +   | +   |
|          | Ea 630 | -                   | -   | -   | -  | +  | +   | +   | +   |
|          | Ea 670 | -                   | -   | -   | -  | +  | +   | +   | +   |
|          | Ea 680 | -                   | -   | -   | -  | +  | +   | +   | +   |
|          | Ea 720 | -                   | -   | -   | -  | +  | +   | +   | +   |
|          | Ea 730 | -                   | -   | -   | -  | +  | +   | +   | +   |
|          | Ea 740 | -                   | -   | -   | -  | +  | +   | +   | +   |
|          | Ea 750 | -                   | -   | -   | -  | +  | +   | +   | +   |
|          | Ea 790 | -                   | -   | -   | -  | +  | +   | +   | +   |
|          | Ea 820 | -                   | -   | -   | -  | +  | +   | +   | +   |
|          | Ea 780 | -                   | -   | -   | -  | -  | +   | +   | +   |
|          | C+     | -                   | -   | -   | -  | -  | +   | +   | +   |

| AMP  | Strain | Concentrations ( $\mu\text{M}$ ) |     |     |    |    |     |     |     |
|------|--------|----------------------------------|-----|-----|----|----|-----|-----|-----|
| CA-M |        | 0.4                              | 1.6 | 6.2 | 25 | 50 | 100 | 150 | 200 |
|      | Ea 230 | -                                | -   | -   | +  | +  | +   | +   | +   |
|      | Ea 240 | -                                | -   | -   | +  | +  | +   | +   | +   |
|      | Ea 250 | -                                | -   | -   | +  | +  | +   | +   | +   |
|      | Ea 260 | -                                | -   | -   | +  | +  | +   | +   | +   |
|      | Ea 270 | -                                | -   | -   | +  | +  | +   | +   | +   |
|      | Ea 280 | -                                | -   | -   | +  | +  | +   | +   | +   |
|      | Ea 310 | -                                | -   | -   | +  | +  | +   | +   | +   |
|      | Ea 320 | -                                | -   | -   | +  | +  | +   | +   | +   |
|      | Ea 340 | -                                | -   | -   | +  | +  | +   | +   | +   |
|      | Ea 350 | -                                | -   | -   | +  | +  | +   | +   | +   |
|      | Ea 410 | -                                | -   | -   | +  | +  | +   | +   | +   |
|      | Ea 430 | -                                | -   | -   | +  | +  | +   | +   | +   |
|      | Ea 450 | -                                | -   | -   | +  | +  | +   | +   | +   |
|      | Ea 460 | -                                | -   | -   | +  | +  | +   | +   | +   |
|      | Ea 470 | -                                | -   | -   | +  | +  | +   | +   | +   |
|      | Ea 480 | -                                | -   | -   | +  | +  | +   | +   | +   |
|      | Ea 500 | -                                | -   | -   | +  | +  | +   | +   | +   |
|      | Ea 510 | -                                | -   | -   | +  | +  | +   | +   | +   |
|      | Ea 520 | -                                | -   | -   | +  | +  | +   | +   | +   |
|      | Ea 540 | -                                | -   | -   | +  | +  | +   | +   | +   |
|      | Ea 580 | -                                | -   | -   | +  | +  | +   | +   | +   |
|      | Ea 620 | -                                | -   | -   | +  | +  | +   | +   | +   |
|      | Ea 630 | -                                | -   | -   | +  | +  | +   | +   | +   |
|      | Ea 670 | -                                | -   | -   | +  | +  | +   | +   | +   |
|      | Ea 570 | -                                | -   | -   | -  | +  | +   | +   | +   |
|      | Ea 610 | -                                | -   | -   | -  | +  | +   | +   | +   |
|      | Ea 720 | -                                | -   | -   | -  | +  | +   | +   | +   |
|      | Ea 740 | -                                | -   | -   | -  | +  | +   | +   | +   |
|      | Ea 750 | -                                | -   | -   | -  | +  | +   | +   | +   |
|      | Ea 780 | -                                | -   | -   | -  | +  | +   | +   | +   |
|      | Ea 790 | -                                | -   | -   | -  | +  | +   | +   | +   |
|      | Ea 820 | -                                | -   | -   | -  | +  | +   | +   | +   |
|      | Ea 390 | -                                | -   | -   | -  | -  | +   | +   | +   |
|      | Ea 490 | -                                | -   | -   | -  | -  | +   | +   | +   |
|      | Ea 680 | -                                | -   | -   | -  | -  | +   | +   | +   |
|      | Ea 730 | -                                | -   | -   | -  | -  | +   | +   | +   |
|      | C+     | -                                | -   | -   | -  | -  | +   | +   | +   |

| AMP | Strain | Concentrations (μM) |     |     |    |    |     |     |     |
|-----|--------|---------------------|-----|-----|----|----|-----|-----|-----|
|     |        | 0.4                 | 1.6 | 6.2 | 25 | 50 | 100 | 150 | 200 |
| 3.1 | Ea 230 | -                   | -   | -   | -  | +  | +   | +   | +   |
|     | Ea 240 | -                   | -   | -   | -  | +  | +   | +   | +   |
|     | Ea 250 | -                   | -   | -   | -  | +  | +   | +   | +   |
|     | Ea 260 | -                   | -   | -   | -  | +  | +   | +   | +   |
|     | Ea 270 | -                   | -   | -   | -  | +  | +   | +   | +   |
|     | Ea 280 | -                   | -   | -   | -  | +  | +   | +   | +   |
|     | Ea 310 | -                   | -   | -   | -  | +  | +   | +   | +   |
|     | Ea 320 | -                   | -   | -   | -  | +  | +   | +   | +   |
|     | Ea 430 | -                   | -   | -   | -  | +  | +   | +   | +   |
|     | Ea 340 | -                   | -   | -   | -  | -  | +   | +   | +   |
|     | Ea 350 | -                   | -   | -   | -  | -  | +   | +   | +   |
|     | Ea 410 | -                   | -   | -   | -  | -  | +   | +   | +   |
|     | Ea 450 | -                   | -   | -   | -  | -  | +   | +   | +   |
|     | Ea 460 | -                   | -   | -   | -  | -  | +   | +   | +   |
|     | Ea 470 | -                   | -   | -   | -  | -  | +   | +   | +   |
|     | Ea 480 | -                   | -   | -   | -  | -  | +   | +   | +   |
|     | Ea 490 | -                   | -   | -   | -  | -  | +   | +   | +   |
|     | Ea 500 | -                   | -   | -   | -  | -  | +   | +   | +   |
|     | Ea 510 | -                   | -   | -   | -  | -  | +   | +   | +   |
|     | Ea 520 | -                   | -   | -   | -  | -  | +   | +   | +   |
|     | Ea 540 | -                   | -   | -   | -  | -  | +   | +   | +   |
|     | Ea 570 | -                   | -   | -   | -  | -  | +   | +   | +   |
|     | Ea 580 | -                   | -   | -   | -  | -  | +   | +   | +   |
|     | Ea 610 | -                   | -   | -   | -  | -  | +   | +   | +   |
|     | Ea 620 | -                   | -   | -   | -  | -  | +   | +   | +   |
|     | Ea 630 | -                   | -   | -   | -  | -  | +   | +   | +   |
|     | Ea 670 | -                   | -   | -   | -  | -  | +   | +   | +   |
|     | Ea 680 | -                   | -   | -   | -  | -  | +   | +   | +   |
|     | Ea 720 | -                   | -   | -   | -  | -  | +   | +   | +   |
|     | Ea 730 | -                   | -   | -   | -  | -  | +   | +   | +   |
|     | Ea 740 | -                   | -   | -   | -  | -  | +   | +   | +   |
|     | Ea 750 | -                   | -   | -   | -  | -  | +   | +   | +   |
|     | Ea 780 | -                   | -   | -   | -  | -  | +   | +   | +   |
|     | Ea 820 | -                   | -   | -   | -  | -  | +   | +   | +   |
|     | Ea 790 | -                   | -   | -   | -  | -  | -   | +   | +   |
|     | Ea 390 | -                   | -   | -   | -  | -  | -   | -   | +   |
|     | C+     | -                   | -   | -   | -  | -  | +   | +   | +   |

| AMP  | Strain | Concentrations (µM) |     |     |    |    |     |     |     |
|------|--------|---------------------|-----|-----|----|----|-----|-----|-----|
| D4E1 |        | 0.4                 | 1.6 | 6.2 | 25 | 50 | 100 | 150 | 200 |
|      | Ea 280 | -                   | -   | -   | +  | +  | +   | +   | +   |
|      | Ea 310 | -                   | -   | -   | +  | +  | +   | +   | +   |
|      | Ea 320 | -                   | -   | -   | +  | +  | +   | +   | +   |
|      | Ea 230 | -                   | -   | -   | -  | +  | +   | +   | +   |
|      | Ea 240 | -                   | -   | -   | -  | +  | +   | +   | +   |
|      | Ea 260 | -                   | -   | -   | -  | +  | +   | +   | +   |
|      | Ea 270 | -                   | -   | -   | -  | +  | +   | +   | +   |
|      | Ea 250 | -                   | -   | -   | -  | -  | +   | +   | +   |
|      | Ea 430 | -                   | -   | -   | -  | -  | +   | +   | +   |
|      | Ea 460 | -                   | -   | -   | -  | -  | +   | +   | +   |
|      | Ea 470 | -                   | -   | -   | -  | -  | +   | +   | +   |
|      | Ea 480 | -                   | -   | -   | -  | -  | +   | +   | +   |
|      | Ea 490 | -                   | -   | -   | -  | -  | +   | +   | +   |
|      | Ea 500 | -                   | -   | -   | -  | -  | +   | +   | +   |
|      | Ea 510 | -                   | -   | -   | -  | -  | +   | +   | +   |
|      | Ea 570 | -                   | -   | -   | -  | -  | +   | +   | +   |
|      | Ea 610 | -                   | -   | -   | -  | -  | +   | +   | +   |
|      | Ea 620 | -                   | -   | -   | -  | -  | +   | +   | +   |
|      | Ea 630 | -                   | -   | -   | -  | -  | +   | +   | +   |
|      | Ea 670 | -                   | -   | -   | -  | -  | +   | +   | +   |
|      | Ea 680 | -                   | -   | -   | -  | -  | +   | +   | +   |
|      | Ea 720 | -                   | -   | -   | -  | -  | +   | +   | +   |
|      | Ea 730 | -                   | -   | -   | -  | -  | +   | +   | +   |
|      | Ea 740 | -                   | -   | -   | -  | -  | +   | +   | +   |
|      | Ea 750 | -                   | -   | -   | -  | -  | +   | +   | +   |
|      | Ea 820 | -                   | -   | -   | -  | -  | +   | +   | +   |
|      | Ea 340 | -                   | -   | -   | -  | -  | -   | +   | +   |
|      | Ea 410 | -                   | -   | -   | -  | -  | -   | +   | +   |
|      | Ea 450 | -                   | -   | -   | -  | -  | -   | +   | +   |
|      | Ea 520 | -                   | -   | -   | -  | -  | -   | +   | +   |
|      | Ea 540 | -                   | -   | -   | -  | -  | -   | +   | +   |
|      | Ea 580 | -                   | -   | -   | -  | -  | -   | +   | +   |
|      | Ea 790 | -                   | -   | -   | -  | -  | -   | +   | +   |
|      | Ea 350 | -                   | -   | -   | -  | -  | -   | -   | +   |
|      | Ea 390 | -                   | -   | -   | -  | -  | -   | -   | +   |
|      | Ea 780 | -                   | -   | -   | -  | -  | -   | -   | -   |
|      | C+     | -                   | -   | -   | -  | -  | +   | +   | +   |
